# Supplementary figures and images for: Is there some predictive factors for isolated brain PROgression in patients with CErebral metastatic MElanoma after stereotactic brain radiotherapy ? PROCEME
Source: Research Square preprint supplement (doi:10.21203/rs.3.rs-4149245/v1), 2024-04-09

Supplementary :


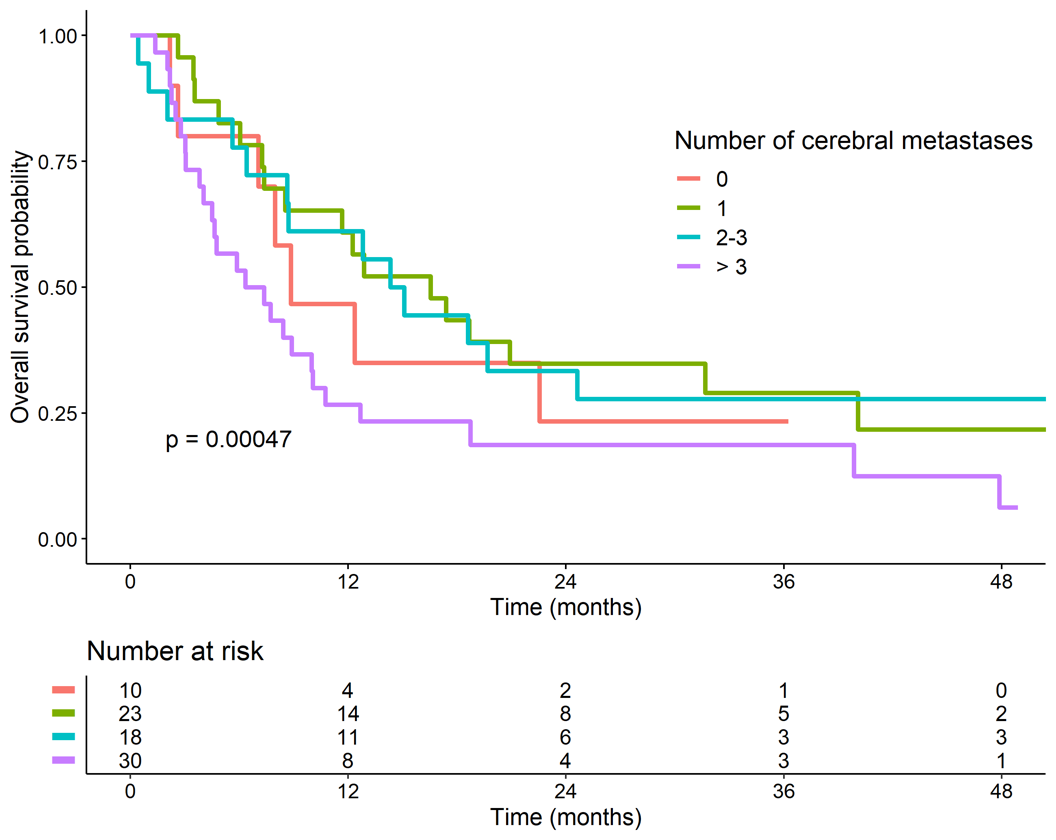


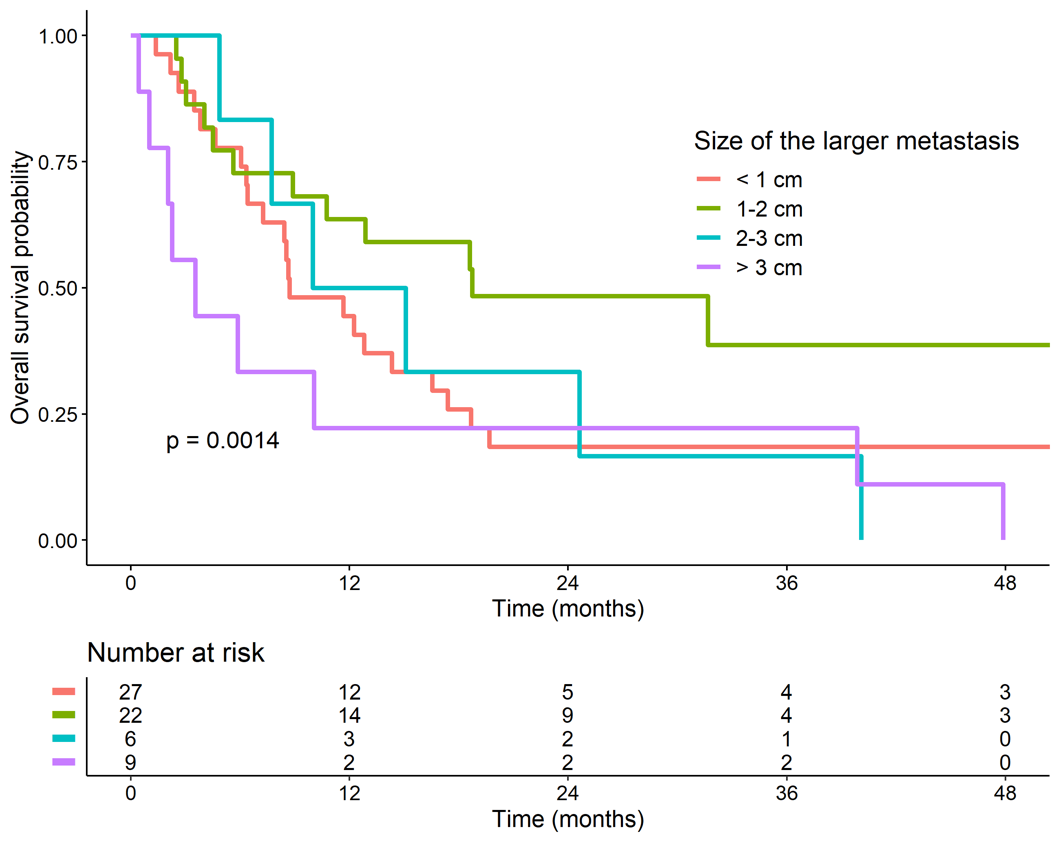

Supplement: Supplementary file 1 [file 8632a72bcaed344b9cc2e7d4.docx]
